# Supplementary material for: Concordance of shoulder symptoms and imaging findings: a protocol for the Finnish Imaging of Shoulder (FIMAGE) study
Source: HighWire-hosted journal article supplement (doi:10.1136/bmjopen-2023-074457), 2023-12-01
Supplement: bmjopen-2023-074457supp002_data_supplement.pdf [file bmjopen-2023-074457supp002_data_supplement.pdf]

Supplementary Table 2 – Special Shoulder Tests

| Special Shoulder Tests                         |                                                |
|------------------------------------------------|------------------------------------------------|
| <b>Stability</b>                               | Apprehension                                   |
|                                                | Relocation                                     |
|                                                | Jerk test                                      |
| <b>Subacromial shoulder pain</b>               | Painful arch                                   |
|                                                | Neer                                           |
|                                                | Hawkings-Kennedy                               |
| <b>Rotator cuff tests</b>                      | Drop arm (SSP)                                 |
|                                                | Full can (SSP)                                 |
|                                                | Empty can/Jobe (SSP)                           |
|                                                | Starter sign/ zero-degree abduction test (SSP) |
|                                                | External rotation lag sign (SSP, ISP)          |
|                                                | 5 <sup>th</sup> finger test (ISP)              |
|                                                | Resisted External Rotation Test (ISP)          |
|                                                | Hornblower (TM)                                |
|                                                | Lift off (SSC)                                 |
|                                                | Internal Rotation Lag Sign (SSC)               |
|                                                | Belly-press (SSC)                              |
|                                                | Bear Hug (SSC)                                 |
|                                                | <b>AC-joint</b>                                |
| Finger sign                                    |                                                |
| Cross-body adduction                           |                                                |
| O'Brian / Active compression test              |                                                |
| <b>Long head of biceps and superior labrum</b> | Speeds (LHB)                                   |
|                                                | Yergason (LHB)                                 |
|                                                | O'Brian (LHB, SLAP)                            |

SA=subacromial, SSP=supraspinatus, ISP=infraspinatus, TM=teres minor, SSC=subscapularis, AC= acromioclavicular, LHB= long head of biceps, SLAP= superior labrum from anterior to posterior
