# Supplementary material for: Concordance of shoulder symptoms and imaging findings: a protocol for the Finnish Imaging of Shoulder (FIMAGE) study
Source: HighWire-hosted journal article supplement (doi:10.1136/bmjopen-2023-074457), 2023-12-01
Supplement: bmjopen-2023-074457supp004_data_supplement.pdf [file bmjopen-2023-074457supp004_data_supplement.pdf]

Supplementary Table 4 – Magnetic resonance imaging

| MRI                                                |                                                                                                                                                                                                                                                                     |
|----------------------------------------------------|---------------------------------------------------------------------------------------------------------------------------------------------------------------------------------------------------------------------------------------------------------------------|
| <b>AC Joint</b>                                    | Abreu classification<br>Grade 0 (No osteoarthritis)<br>Grade 1 (Mild osteoarthritis)<br>Grade 2 (Moderate osteoarthritis)<br>Grade 3 (Severe osteoarthritis)                                                                                                        |
|                                                    | ACJ effusion / synovitis (Yes/No)                                                                                                                                                                                                                                   |
|                                                    | ACJ bone edema (Yes/No)                                                                                                                                                                                                                                             |
| <b>GH Joint</b>                                    | Cartilage damage<br>Grade 1 (Normal)<br>Grade 2 (Cartilage damage)<br>Grade 3 (Endstage osteoarthritis)                                                                                                                                                             |
|                                                    | Subchondral bone cyst (Yes/No)                                                                                                                                                                                                                                      |
|                                                    | Bone edema (Yes/No)                                                                                                                                                                                                                                                 |
|                                                    | Posterior glenoid retroversion (degrees)                                                                                                                                                                                                                            |
| <b>Subacromial space</b>                           | SA bursitis<br>Grade 1 (Normal)<br>Grade 2 (Mild)<br>Grade 3 (Moderate)<br>Grade 4 (Severe)                                                                                                                                                                         |
| <b>Rotator cuff (SSC, SSP, ISP, TM separately)</b> | Zlatkin classification<br>Grade 0 (Normal tendon)<br>Grade 1 (Tendinopathy)<br>Grade 2 (Partial thickness tear)<br>Grade 3 (Full thickness tear)                                                                                                                    |
|                                                    | Tear size in mm (only if full thickness tear)                                                                                                                                                                                                                       |
|                                                    | Tendon retraction in mm (only if full thickness tear)                                                                                                                                                                                                               |
|                                                    | Calcifications (Yes/No)                                                                                                                                                                                                                                             |
|                                                    | Muscle atrophy (Goutallier/ Fuchs)<br>Goutallier 0 (Normal muscle)<br>Goutallier I (Some fatty streaks)<br>Goutallier II (Less than 50% fatty muscle atrophy)<br>Goutallier III (50% fatty muscle atrophy)<br>Goutallier IV (greater than 50% fatty muscle atrophy) |
|                                                    | Traumatic muscle edema (Yes/No)                                                                                                                                                                                                                                     |
|                                                    |                                                                                                                                                                                                                                                                     |
| <b>Nerves</b>                                      | Denervation edema (Yes/No)                                                                                                                                                                                                                                          |
|                                                    | Subscapular notch entrapment (Yes/No)                                                                                                                                                                                                                               |
| <b>GH Joint: bone and cartilage</b>                | Cartilage damage<br>Grade 1 (Normal)<br>Grade 2 (Cartilage damage)<br>Grade 3 (Endstage osteoarthritis)                                                                                                                                                             |
|                                                    | Subchondral bone cyst (Yes/No)                                                                                                                                                                                                                                      |
|                                                    | Bone edema (Yes/No)                                                                                                                                                                                                                                                 |
|                                                    | Posterior glenoid retroversion (degrees)                                                                                                                                                                                                                            |
|                                                    | Hill Sachs (Yes/No)                                                                                                                                                                                                                                                 |
|                                                    | Bony Bankart lesions (Yes/No)                                                                                                                                                                                                                                       |
|                                                    | Other fractures (Yes/No)                                                                                                                                                                                                                                            |
|                                                    | Osteonecrosis (Yes/No)                                                                                                                                                                                                                                              |

|                                                       |                                                                                                                                                            |
|-------------------------------------------------------|------------------------------------------------------------------------------------------------------------------------------------------------------------|
| <b>GH Joint: labrum and biceps</b>                    | Anterior labrum<br>Grade 1 (Normal)<br>Grade 2 (Small/intrasubstance tear)<br>Grade 3 (Large/complete tear)                                                |
|                                                       | Anterior labral cysts (Yes/No)                                                                                                                             |
|                                                       | Posterior labrum (Grade I-III)<br>Grade 1 (Normal)<br>Grade 2 (Small tear)<br>Grade 3 (Large tear)                                                         |
|                                                       | Posterior labral cysts (Yes/No)                                                                                                                            |
|                                                       | SLAP lesion (Snyder I-IV)                                                                                                                                  |
|                                                       | Capsule thickness (Grade I-III)                                                                                                                            |
|                                                       | Long head of biceps (Grade I-IV)<br>Grade 0 (Normal tendon)<br>Grade 1 (Tendinopathy)<br>Grade 2 (Partial thickness tear)<br>Grade 3 (Full thickness tear) |
|                                                       | <b>GH Joint: anatomy and variants</b>                                                                                                                      |
| Acromial spur (Yes/No)                                |                                                                                                                                                            |
| Bigliani classification<br>Type 1<br>Type 2<br>Type 3 |                                                                                                                                                            |
| Critical shoulder angle (degrees)                     |                                                                                                                                                            |
| Acromion index (scalar)                               |                                                                                                                                                            |
| Acromion slope (degrees)                              |                                                                                                                                                            |
| Lateral acromion angle (degrees)                      |                                                                                                                                                            |
| Sublabral recess (Yes/No)                             |                                                                                                                                                            |
| Sublabral hole (Yes/No)                               |                                                                                                                                                            |
| Bufort complex (Yes/No)                               |                                                                                                                                                            |
| Os acromiale (Yes/No)                                 |                                                                                                                                                            |
| Bare area (Yes/No)                                    |                                                                                                                                                            |
| Tubercle of Assaki (Yes/No)                           |                                                                                                                                                            |

AC= acromioclavicular, ACJ= acromioclavicular joint, GH=glenohumeral, SA=subacromial, SSC=subscapularis, SSP=supraspinatus, ISP=infraspinatus, TM=teres minor, SLAP= superior labrum from anterior to posterior
